# Supplementary material for: Comparison of New Kairomone-Based Lures for Cydia pomonella (Lepidoptera: Tortricidae) in Italy and USA
Source: MDPI journal article supplement (doi:10.3390/insects12010072), 2021-01-15
Supplement: s1 [file s1]

## Supplementary material

**Table S1.** Summary of 14 lure trials for codling moths (*Cydia pomonella* L.) conducted in unsprayed and organic apple and pear orchards treated with or without mating disruption (MD) in Washington State, USA, and in the Emilia-Romagna Region, Italy, during the period 2019/2020.

| Orchard (Region, State)<br>Location Coordinates                        | Crop, Cultivar, Surface                      | Grower<br>Managemen<br>t | Trial Periods                                                            |
|------------------------------------------------------------------------|----------------------------------------------|--------------------------|--------------------------------------------------------------------------|
| Wapato (WA, USA)<br>46°24'33.08"N, 120°29'0.55"W                       | Apple, cv Delicious, 4 ha                    | Unsprayed<br>(no-MD)     | 4 May–22 July 2019                                                       |
| San Bartolomeo in Bosco (FE, Italy)<br>44°42'53.69"N, 11°35'56.70"E    | Apple, cv Fuji, 1.5 ha                       | Unsprayed<br>(no-MD)     | 7 July–1 September 2020                                                  |
| San Cesario sul Panaro (MO, Italy)<br>44°34'2.39"N, 11°0'46.83"E       | Pear, cv Abate Fetel and<br>Williams, 0.5 ha | Unsprayed<br>(no-MD)     | 17 July–16 August 2019<br>27 April–11 June 2020<br>12 June–8 August 2020 |
| Baricella (BO, Italy)<br>44°38'54.28"N, 11°32'41.17"E                  | Pear, cv Abate Fetel and<br>Decana, 0.4 ha   | Unsprayed<br>(no-MD)     | 11 July–16 August 2019                                                   |
| Villa Prati di Bagnacavallo (RA, Italy)<br>44°27'26.23"N, 12°1'55.47"E | Apple, cv Primera, 3.5 ha                    | Organic<br>(MD)          | 28 June–6 August 2019<br>6 August–16 September 2019                      |
| Villa Prati di Bagnacavallo (RA, Italy)<br>44°27'33.65"N, 12°1'43.48"E | Apple, cv Gold Rush, 3.0 ha                  | Organic<br>(MD)          | 12 July–2 August 2019<br>2 August–16 September 2019                      |
| Villa Prati di Bagnacavallo (RA, Italy)<br>44°27'25.87"N, 12°1'57.71"E | Apple, cv Gaia, 1.5 ha                       | Organic<br>(MD)          | 8 April–3 June 2020<br>10 June–30 July 2020                              |
| Renazzo (FE, Italy)<br>44°46'12.93"N, 11°18'8.00"E                     | Pear, cv Abate Fetel, 1.2 ha                 | Organic<br>(MD)          | 10 April–5 June 2020<br>5 June–5 August 2020                             |

Mating disruption (MD) was performed by using dispensers loaded with (*E,E*)-8,10-dodecadien-1-ol (sex pheromone).

**Author Contributions:** Conceptualization and methodology, M.P. and A.K.; investigation, M.P. (Italy), A.K., M.P. and E.B. (USA); data curation and statistical analysis, M.P. and R.F.; writing—original draft preparation, M.P.; writing—review and editing, M.P., R.F., E.B., M.T., A.K. and S.A.; supervision, S.A. All authors have read and agreed to the published version of the manuscript.

**Funding:** This research received no external funding.

**Acknowledgments:** The authors thank Trécé Inc. for supplying the lures and trapping materials.
